# Supplementary material
Source: PubMed Central journal article supplement (PMC6119225)
Supplement: Supp_Fig1.pdf [file Supp_Fig1.pdf]

## Supplementary Data

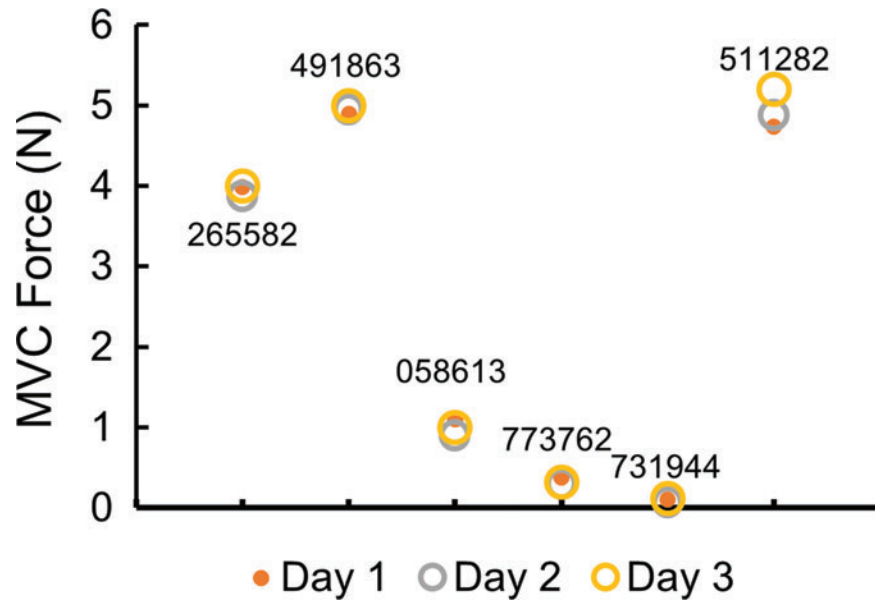

**SUPPLEMENTARY FIG. 1.** Maximum voluntary contraction (MVC) forces for each individual for their stronger hand across the 3 baseline days. Note, the 3 baseline days were spread over a 10-day period.
