# Supplementary material
Source: PubMed Central journal article supplement (PMC6119225)
Supplement: Supp_Fig3.pdf [file Supp_Fig3.pdf]

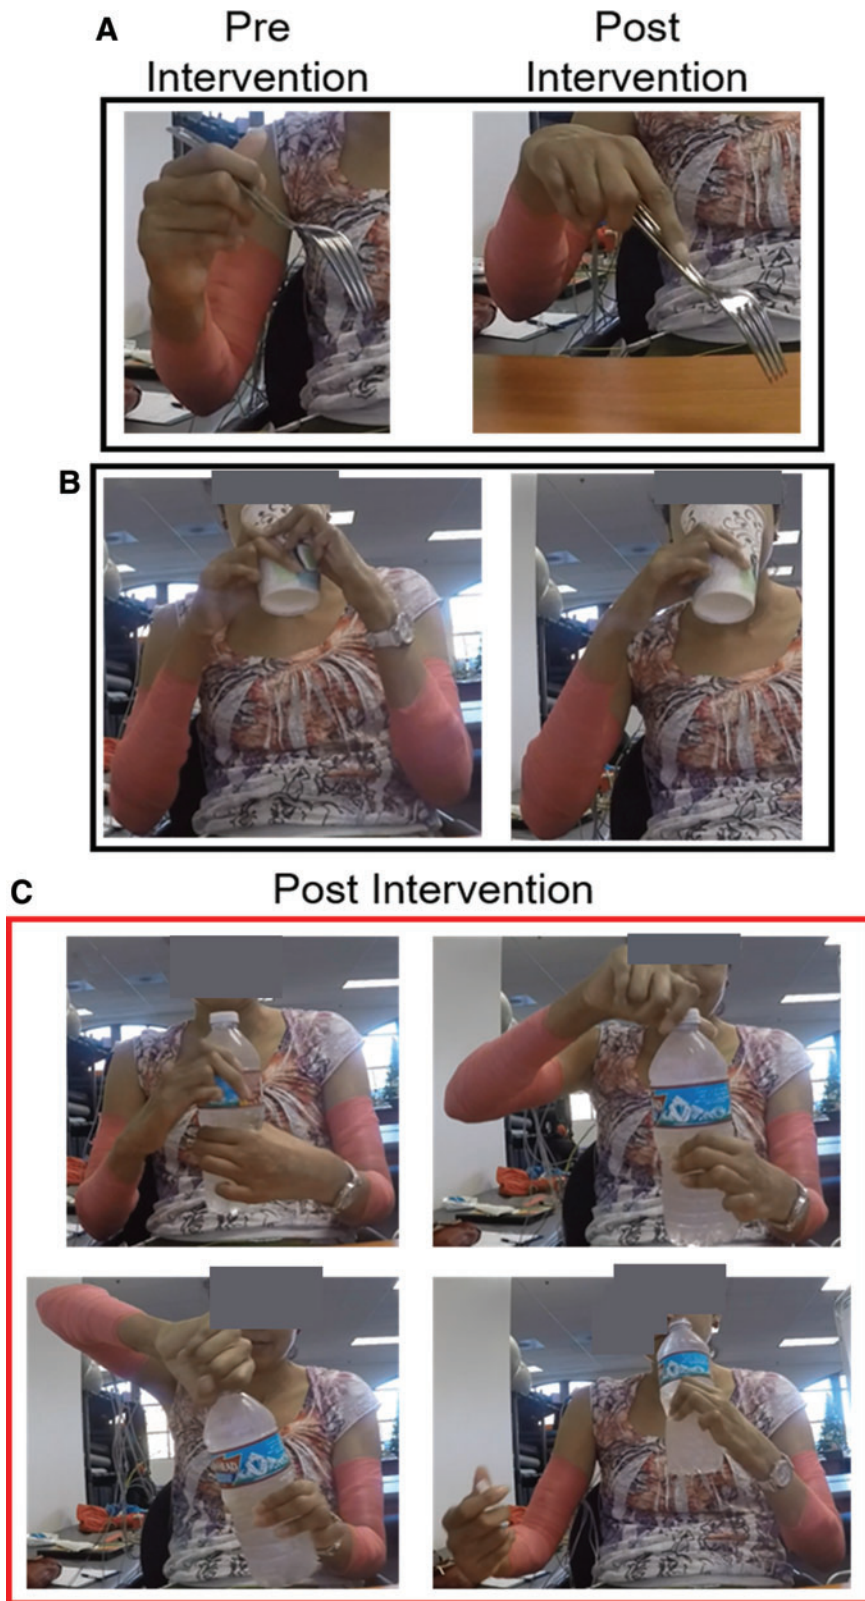

**SUPPLEMENTARY FIG. 3.** (A) Patient demonstrating handling a fork before and after the intervention. (B) Same patient demonstrating the ability to hold a cup before with two hands and after the intervention with a single hand. (C) Series of pictures demonstrating the ability to successfully open a bottle of water post-intervention.
