# Supplementary material
Source: PubMed Central journal article supplement (PMC6119225)

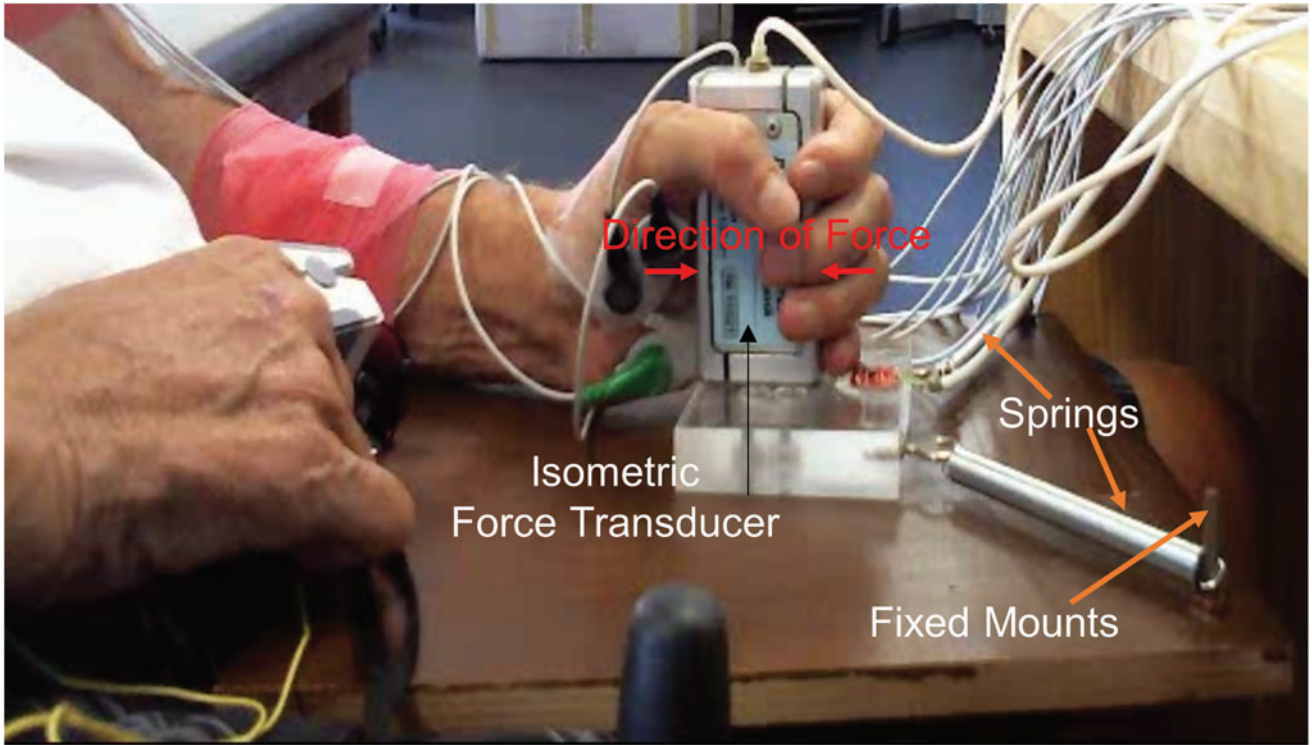

**SUPPLEMENTARY FIG. 2.** Image of the custom built setup including the isometric force transducer.

Supplement: Supp_Fig2.pdf [file Supp_Fig2.pdf]
